# Supplementary material for: A computational study on the mechanism and kinetics of the reaction between CH3CH2S and OH
Source: Royal Society of Chemistry journal article supplement (doi:10.1039/c4ra07780f), 2014-01-01
Supplement: c4ra07780f1.pdf [file c4ra07780f1.pdf]

## Supporting information

-for-

### **Computational study on the reaction mechanism of CH<sub>3</sub>CH<sub>2</sub>S with OH radical**

Tianlei Zhang<sup>a,\*</sup>, Rui Wang<sup>a</sup>, Suotian Min<sup>a</sup>, Liting Zhou<sup>a</sup> Qiong Xu<sup>a</sup>, Zhiyin Wang<sup>a</sup>,

Wenliang Wang<sup>b \*</sup>

<sup>a</sup> School of Chemical & Environment Science, Shaanxi University of Technology, Hanzhong, Shaanxi 723001, China

<sup>b</sup> Key Laboratory for Macromolecular Science of Shaanxi Province, School of Chemistry & Chemical Engineering, Shaanxi Normal University, Xi'an, Shaanxi 710062, China

---

\* Corresponding authors. Tel: +86-0916-2641083, Fax: +86-0916-2641083.

e-mail: [ztianlei@live.cn](mailto:ztianlei@live.cn) (T. L. Zhang); [wliwang@snnu.edu.cn](mailto:wliwang@snnu.edu.cn) (W. L. Wang).

**Table S1** Spin contamination for the species that involved in C<sub>2</sub>H<sub>5</sub>S+OH reaction

| Species                                          | <S <sup>2</sup> > | Species                                        | <S <sup>2</sup> > | Species                                          | <S <sup>2</sup> > |
|--------------------------------------------------|-------------------|------------------------------------------------|-------------------|--------------------------------------------------|-------------------|
| C <sub>2</sub> H <sub>5</sub> S                  | 0.7500            | OH                                             | 0.7500            | <sup>1</sup> CH <sub>3</sub> CH <sub>2</sub> SOH | 0.0001            |
| TS1                                              | 0.0001            | CH <sub>3</sub>                                | 0.7501            | SCH <sub>2</sub> OH                              | 0.7501            |
| TS2                                              | 0.0001            | CH <sub>3</sub> OH                             | 0.0000            | <sup>1</sup> CH <sub>2</sub> S                   | 0.0002            |
| TS3                                              | 2.0004            | TS4                                            | 2.0005            | <sup>3</sup> CH <sub>2</sub> S                   | 2.0007            |
| TS5                                              | 2.0009            | CH <sub>2</sub> SOH                            | 0.7505            | TS6a                                             | 0.0000            |
| TS6b                                             | 0.0000            | <sup>1</sup> CH <sub>3</sub> CHS               | 0.0000            | H <sub>2</sub> O                                 | 0.0000            |
| TS7a                                             | 0.0000            | TS7b                                           | 0.0000            | <sup>1</sup> CH <sub>2</sub> CH <sub>2</sub> S   | 0.0000            |
| <sup>3</sup> CH <sub>3</sub> CH <sub>2</sub> SOH | 2.0002            | TS8a                                           | 2.0000            | TS8b                                             | 2.0000            |
| <sup>3</sup> CH <sub>3</sub> CHS                 | 2.0000            | TS9a                                           | 2.0001            | TS9b                                             | 2.0001            |
| TS9c                                             | 2.0001            | <sup>3</sup> CH <sub>2</sub> CH <sub>2</sub> S | 2.0000            | TS10                                             | 0.0007            |
| HCSOH                                            | 0.0000            | CH <sub>4</sub>                                | 0.0000            | TS11                                             | 0.0006            |
| CH <sub>2</sub> SO                               | 0.0000            | TS11-1                                         | 0.0005            | c-CH <sub>3</sub> CHSO                           | 0.0000            |
| TS12                                             | 0.0000            | CH <sub>2</sub> CH <sub>2</sub>                | 0.0000            | HSOH                                             | 0.0000            |
| TS13                                             | 0.0000            | CH <sub>3</sub> CHSO                           | 0.0002            | H <sub>2</sub>                                   | 0.0000            |
| TS13-1                                           | 0.0000            | c-CH <sub>3</sub> CHSO                         | 0.0007            | TS14                                             | 0.0008            |
| SO                                               | 0.0004            | TS15                                           | 0.0003            | CH <sub>3</sub> CH <sub>2</sub> SHO              | 0.0000            |
| CH <sub>3</sub> CH <sub>2</sub> SH               | 0.0000            | TS16                                           | 0.0003            | CH <sub>3</sub> OH                               | 0.0004            |

**Table S2** Relative energies ( $\Delta E$  in kcal·mol<sup>-1</sup>), enthalpies ( $\Delta H(298)$  in kcal·mol<sup>-1</sup>), and free energies ( $\Delta G(298)$  in kcal·mol<sup>-1</sup>) for the C<sub>2</sub>H<sub>5</sub>S+OH reaction

| species                                                              | $\Delta E$ | $\Delta H$     | $\Delta G$ |
|----------------------------------------------------------------------|------------|----------------|------------|
| C <sub>2</sub> H <sub>5</sub> S+OH                                   | 0.00       | 0.00           | 0.00       |
| TS1                                                                  | 24.78      | 24.19          | 33.77      |
| P1(CH <sub>3</sub> +SCH <sub>2</sub> OH)                             | -5.74      | -5.74(-5.14)   | -7.53      |
| TS2                                                                  | 18.23      | 17.64          | 27.85      |
| P2(CH <sub>3</sub> OH+ <sup>1</sup> CH <sub>2</sub> S)               | -53.90     | -53.90(-52.16) | -54.78     |
| TS3                                                                  | 31.95      | 31.35          | 40.43      |
| TS4                                                                  | 33.34      | 32.75          | 41.39      |
| P4(CH <sub>3</sub> OH+ <sup>3</sup> CH <sub>2</sub> S)               | 10.08      | 10.08          | 7.79       |
| TS5                                                                  | 30.02      | 29.42          | 36.75      |
| P5(CH <sub>3</sub> +CH <sub>2</sub> SOH)                             | -10.91     | -10.91(-11.08) | -12.98     |
| <sup>1</sup> CH <sub>3</sub> CH <sub>2</sub> SOH                     | -69.82     | -70.41         | -59.24     |
| TS6a                                                                 | -17.88     | -18.47         | -7.49      |
| TS6b                                                                 | -17.99     | -18.59         | -7.62      |
| P6( <sup>1</sup> CH <sub>3</sub> CHS+H <sub>2</sub> O)               | -73.84     | -73.84(-72.51) | -73.82     |
| TS7a                                                                 | -2.04      | -2.63          | 8.69       |
| TS7b                                                                 | -2.40      | -3.00          | 8.35       |
| P7( <sup>1</sup> CH <sub>2</sub> CH <sub>2</sub> S+H <sub>2</sub> O) | -72.24     | -72.24(71.02)  | -71.37     |
| <sup>3</sup> CH <sub>3</sub> CH <sub>2</sub> SOH                     | -13.37     | -13.97         | -3.61      |
| TS8a                                                                 | -1.24      | -1.91          | 6.46       |
| TS8b                                                                 | -0.72      | -1.45          | 7.21       |
| P8( <sup>3</sup> CH <sub>3</sub> CHS+H <sub>2</sub> O)               | -24.06     | -26.24(-27.37) | -26.91     |
| TS9a                                                                 | 4.73       | 4.14           | 12.44      |
| TS9b                                                                 | 1.82       | 1.22           | 9.20       |
| TS9c                                                                 | 0.57       | -0.02          | 8.80       |
| P9( <sup>3</sup> CH <sub>2</sub> CH <sub>2</sub> S+H <sub>2</sub> O) | -18.02     | -18.02(-17.58) | -19.23     |
| TS10                                                                 | 9.27       | 8.56           | 18.00      |
| P10(HCSOH+CH <sub>4</sub> )                                          | -20.28     | -20.06(-19.79) | -19.79     |
| TS11                                                                 | 4.70       | 3.40           | 14.36      |
| P11(CH <sub>2</sub> SO+CH <sub>4</sub> )                             | -58.15     | -58.15(-57.46) | -57.13     |
| TS11-1+CH <sub>4</sub>                                               | -6.04      | -6.04          | -4.79      |
| c-CH <sub>2</sub> SO+CH <sub>4</sub>                                 | -37.26     | -37.61         | -36.33     |
| TS12                                                                 | -13.28     | -14.58         | -3.47      |
| P12(CH <sub>2</sub> CH <sub>2</sub> +HSOH)                           | -42.69     | -42.94(-42.97) | -43.41     |
| TS13                                                                 | -0.18      | -1.90          | 9.98       |
| P13(CH <sub>3</sub> CHSO+H <sub>2</sub> )                            | -46.88     | -46.88(-47.42) | -43.69     |
| TS13-1+H <sub>2</sub>                                                | -2.11      | -2.11          | 0.71       |
| c-CH <sub>3</sub> CHSO+H <sub>2</sub>                                | -31.47     | -31.33         | -28.26     |
| TS14                                                                 | 11.40      | 9.84           | 21.50      |
| P14(CH <sub>2</sub> CH <sub>2</sub> +SO+H <sub>2</sub> )             | 2.00       | 2.59(1.04)     | -4.95      |
| TS15                                                                 | -11.80     | -13.08         | -2.33      |
| P15(CH <sub>3</sub> CH <sub>2</sub> SHO)                             | -51.25     | -52.62(-52.09) | -41.61     |
| CH <sub>3</sub> CH <sub>2</sub> SH + O                               | 64.10      | 64.10          | 66.31      |
| TS16                                                                 | 20.85      | 20.25          | 30.60      |
| P16(CH <sub>3</sub> OH+CH <sub>2</sub> S)                            | -53.89     | -53.89(-49.94) | -54.77     |

The values without and with parentheses were the values respectively obtained from CBS-QB3 and CCSD(T)/aug-cc-pVTZ//B3LYP/CBSB7 level of theory.

**Table S3** Rate constants ( $\text{cm}^3\cdot\text{molecule}^{-1}\cdot\text{s}^{-1}$ ) for Channel R6, Channel R12, Channel R13, Channel R15 and the total rate constant in the  $\text{C}_2\text{H}_5\text{S} + \text{OH}$  reaction

| T(K) | $k_{R6}$ | $k_{R12}$ | $k_{R13}$ | $k_{R15}$ | $k_{\text{total}}$ |
|------|----------|-----------|-----------|-----------|--------------------|
| 200  | 1.82E-13 | 8.96E-14  | 2.65E-14  | 6.62E-14  | 3.64E-13           |
| 236  | 1.81E-13 | 8.90E-14  | 2.19E-14  | 6.19E-14  | 3.54E-13           |
| 250  | 1.80E-13 | 8.86E-14  | 2.05E-14  | 6.07E-14  | 3.50E-13           |
| 275  | 1.79E-13 | 8.83E-14  | 1.86E-14  | 5.92E-14  | 3.45E-13           |
| 298  | 1.81E-13 | 8.99E-14  | 1.73E-14  | 5.82E-14  | 3.46E-13           |
| 300  | 1.82E-13 | 9.01E-14  | 1.72E-14  | 5.82E-14  | 3.48E-13           |
| 309  | 1.84E-13 | 9.09E-14  | 1.68E-14  | 5.79E-14  | 3.50E-13           |
| 325  | 1.87E-13 | 9.26E-14  | 1.61E-14  | 5.77E-14  | 3.53E-13           |
| 350  | 1.93E-13 | 9.59E-14  | 1.52E-14  | 5.75E-14  | 3.62E-13           |
| 420  | 2.17E-13 | 1.08E-13  | 1.37E-14  | 5.85E-14  | 3.97E-13           |
| 500  | 2.55E-13 | 1.27E-13  | 1.31E-14  | 6.15E-14  | 4.57E-13           |
| 600  | 3.19E-13 | 1.57E-13  | 1.33E-14  | 6.75E-14  | 5.57E-13           |
| 800  | 5.00E-13 | 2.41E-13  | 1.55E-14  | 8.50E-14  | 8.42E-13           |
| 1000 | 7.62E-13 | 3.58E-13  | 1.96E-14  | 1.09E-13  | 1.25E-12           |
| 1200 | 1.11E-12 | 5.13E-13  | 2.53E-14  | 1.40E-13  | 1.79E-12           |
| 1250 | 1.22E-12 | 5.58E-13  | 2.70E-14  | 1.48E-13  | 1.95E-12           |
| 1500 | 1.83E-12 | 8.25E-13  | 3.72E-14  | 1.98E-13  | 2.89E-12           |
| 1750 | 2.62E-12 | 1.17E-12  | 5.03E-14  | 2.60E-13  | 4.10E-12           |
| 2000 | 3.60E-12 | 1.59E-12  | 6.66E-14  | 3.33E-13  | 5.59E-12           |
| 2250 | 4.79E-12 | 2.09E-12  | 8.62E-14  | 4.20E-13  | 7.39E-12           |
| 2500 | 6.20E-12 | 2.69E-12  | 1.10E-13  | 5.19E-13  | 9.52E-12           |
| 2750 | 7.83E-12 | 3.38E-12  | 1.37E-13  | 6.33E-13  | 1.20E-11           |
| 3000 | 9.71E-12 | 4.18E-12  | 1.68E-13  | 7.61E-13  | 1.48E-11           |

**Table S4** The branching ratios of channel R6, R12, R13 and R15 in the C<sub>2</sub>H<sub>5</sub>S + OH reaction

| T(K) | $k_{R6}/k_{\text{total}}$ | $k_{R12}/k_{\text{total}}$ | $k_{R13}/k_{\text{total}}$ | $k_{R15}/k_{\text{total}}$ |
|------|---------------------------|----------------------------|----------------------------|----------------------------|
| 200  | 0.50                      | 0.25                       | 0.07                       | 0.18                       |
| 236  | 0.51                      | 0.25                       | 0.06                       | 0.17                       |
| 250  | 0.51                      | 0.25                       | 0.06                       | 0.17                       |
| 275  | 0.52                      | 0.26                       | 0.05                       | 0.17                       |
| 298  | 0.52                      | 0.26                       | 0.05                       | 0.17                       |
| 300  | 0.52                      | 0.26                       | 0.05                       | 0.17                       |
| 309  | 0.53                      | 0.26                       | 0.05                       | 0.17                       |
| 325  | 0.53                      | 0.26                       | 0.05                       | 0.16                       |
| 350  | 0.53                      | 0.27                       | 0.04                       | 0.16                       |
| 420  | 0.55                      | 0.27                       | 0.03                       | 0.15                       |
| 500  | 0.56                      | 0.28                       | 0.03                       | 0.13                       |
| 600  | 0.57                      | 0.28                       | 0.02                       | 0.12                       |
| 800  | 0.59                      | 0.29                       | 0.02                       | 0.10                       |
| 1000 | 0.61                      | 0.29                       | 0.02                       | 0.09                       |
| 1200 | 0.62                      | 0.29                       | 0.01                       | 0.08                       |
| 1250 | 0.62                      | 0.29                       | 0.01                       | 0.08                       |
| 1500 | 0.63                      | 0.29                       | 0.01                       | 0.07                       |
| 1750 | 0.64                      | 0.29                       | 0.01                       | 0.06                       |
| 2000 | 0.64                      | 0.28                       | 0.01                       | 0.06                       |
| 2250 | 0.65                      | 0.28                       | 0.01                       | 0.06                       |
| 2500 | 0.65                      | 0.28                       | 0.01                       | 0.05                       |
| 2750 | 0.65                      | 0.28                       | 0.01                       | 0.05                       |
| 3000 | 0.66                      | 0.28                       | 0.01                       | 0.05                       |

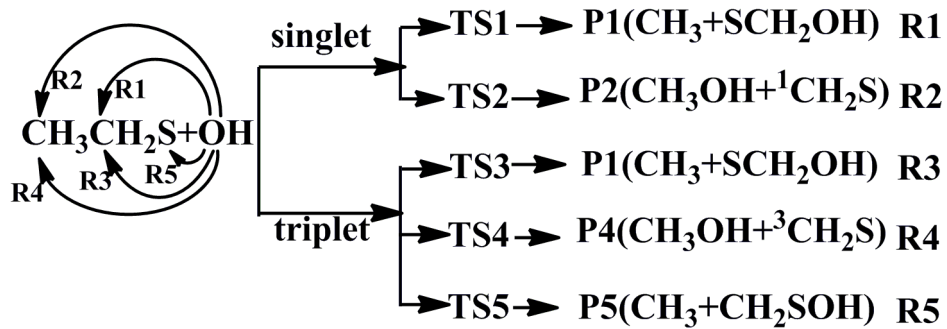

**Scheme S1** Brief description of the processes for nucleophilic substitution reaction of  $\text{C}_2\text{H}_5\text{S}^+\text{OH}$  on the singlet and triplet PES

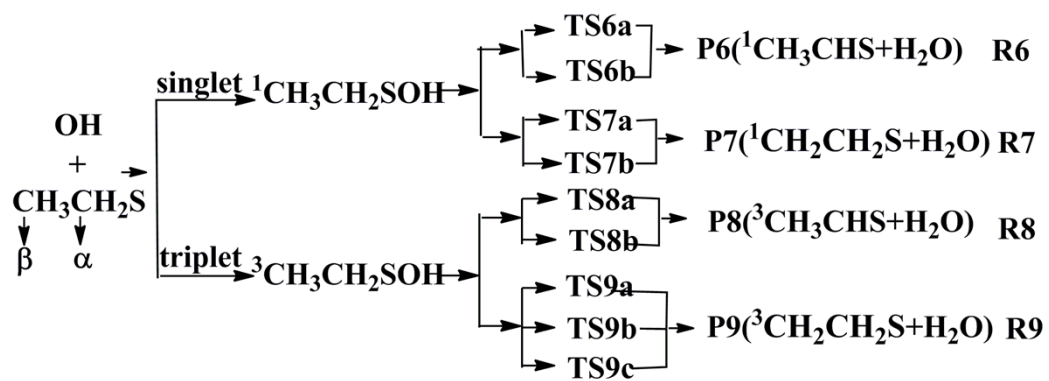

**Scheme S2** Brief description of the processes for the formation of H<sub>2</sub>O involves in the addition-elimination reaction of C<sub>2</sub>H<sub>5</sub>S+OH on the singlet and triplet PES

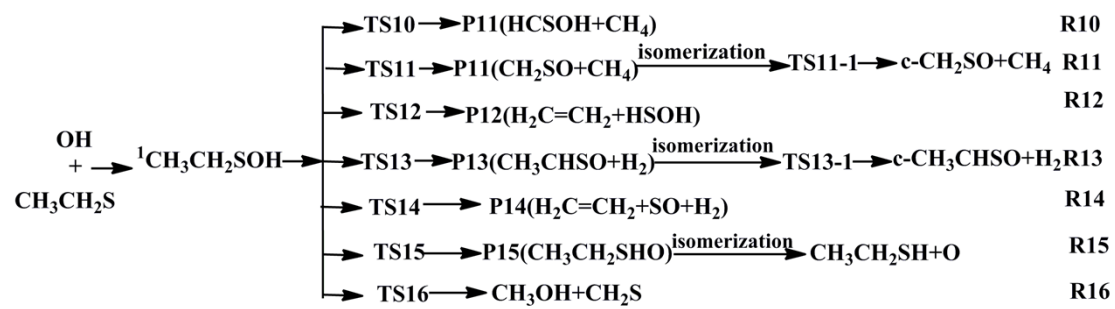

**Scheme S3** Brief description of the processes for the formation of  $\text{CH}_4$ ,  $\text{H}_2$ ,  $\text{O}$  and  $\text{CH}_3\text{OH}$  involves in the addition-elimination reaction of  $\text{C}_2\text{H}_5\text{S} + \text{OH}$  on the singlet PES



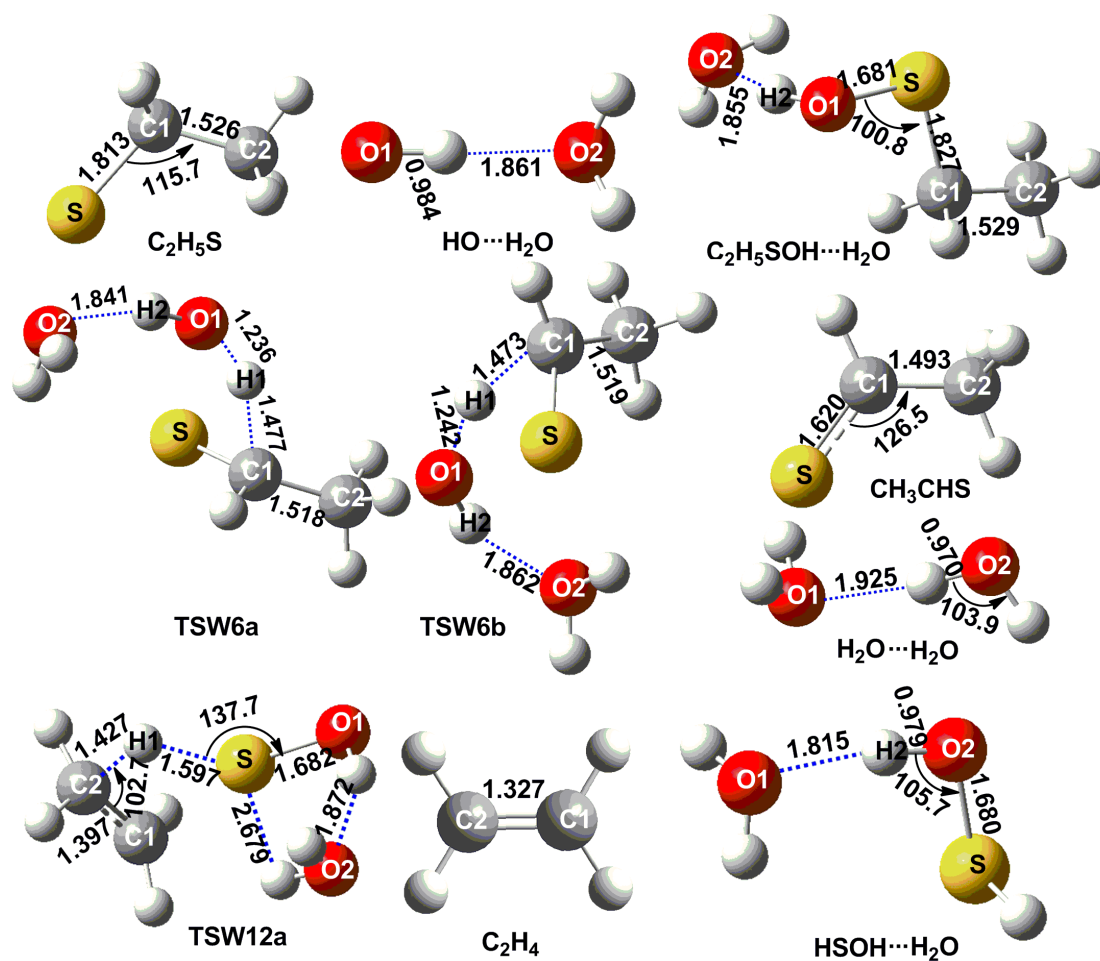

**Figure S1** The geometrical structures of the optimized transition states products involving water-catalyzed the formation of H<sub>2</sub>O and HSOH

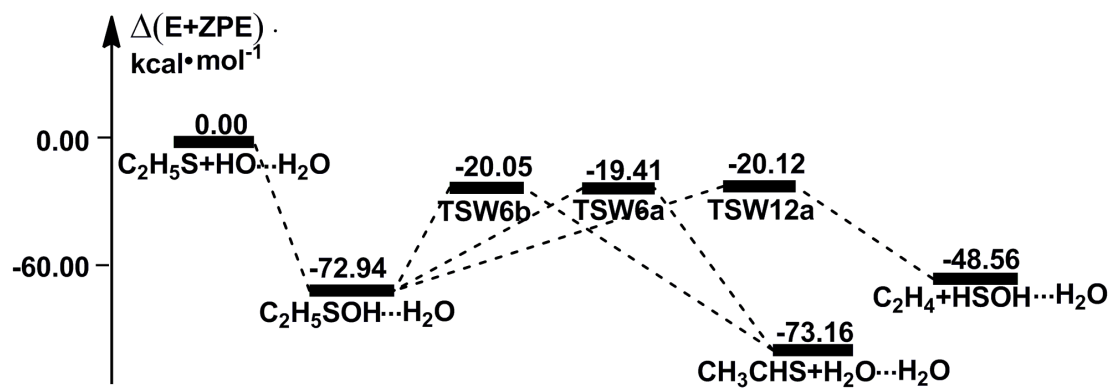

**Table S5** Relative energies ( $\Delta E$  in kcal·mol<sup>-1</sup>), enthalpies ( $\Delta H(298)$  in kcal·mol<sup>-1</sup>), and free energies ( $\Delta G(298)$  in kcal·mol<sup>-1</sup>) for water-catalyzed channels of H<sub>2</sub>O and HSOH formation in the addition-elimination reaction of C<sub>2</sub>H<sub>5</sub>S+OH at the CBS-QB3 level of theory

| species                                                 | $\Delta E$ | $\Delta H$ | $\Delta G$ |
|---------------------------------------------------------|------------|------------|------------|
| C <sub>2</sub> H <sub>5</sub> S+HO···H <sub>2</sub> O   | 0.00       | 0.00       | 0.00       |
| C <sub>2</sub> H <sub>5</sub> SOH···OH <sub>2</sub>     | -72.94     | -73.53     | -61.84     |
| TSW6a                                                   | -19.41     | -20.01     | -7.80      |
| TSW6b                                                   | -20.05     | -20.64     | -7.50      |
| CH <sub>3</sub> CHS+H <sub>2</sub> O···H <sub>2</sub> O | -73.16     | -73.16     | -74.39     |
| TSW12a                                                  | -20.12     | -20.72     | -7.72      |
| C <sub>2</sub> H <sub>4</sub> +HSOH···H <sub>2</sub> O  | -48.56     | -48.56     | -47.76     |

The values without and with parentheses were the values respectively obtained from CBS-QB3 and CCSD(T)/aug-cc-pVTZ//B3LYP/CBSB7 level of theory.

The geometrical structures of the optimized transition states products involving water-catalyzed the formation of H<sub>2</sub>O and HSOH were showed in Figure S1, meanwhile schematic energy diagram for water-catalyzed channels of H<sub>2</sub>O and HSOH formation in the addition-elimination reaction of C<sub>2</sub>H<sub>5</sub>S+OH at the CBS-QB3 level of theory were displayed in Figure S2. Besides, relative energies ( $\Delta E$  in kcal·mol<sup>-1</sup>), enthalpies ( $\Delta H(298)$  in kcal·mol<sup>-1</sup>), and free energies ( $\Delta G(298)$  in kcal·mol<sup>-1</sup>) for water-catalyzed channels of H<sub>2</sub>O and HSOH formation were involved in Table S5. As seen in Fig. S1 and Fig. S2, the hydrogen abstraction reaction of Channel RW6 and RW12, processes which were similar to the corresponding formations of H<sub>2</sub>O and HSOH without a water molecule (Channel R6 in Fig. 3, Channel R12 in Fig. 5). From a geometric point of view, compared with TS6a, TS6b and TS12 in Fig.3 and Fig. 5, the water molecule in the corresponding transition states TSW6a, TSW6b and TSW12 did not change their features. The positive catalytic effect computed for TSW6a, TSW6b and TSW12 could be addressed at an additional stabilization originated by the one hydrogen bond (H(2)···O(4) and H(4)···O(2)) of water molecule, which would not have had a direct effect on the reaction side.

**Table S6** Rate constants ( $\text{cm}^3\cdot\text{molecule}^{-1}\cdot\text{s}^{-1}$ ) for Channel RW6, Channel RW12, the total rate constant  $k_{\text{total}}(\text{w})$  and the effective rate constant  $k'_{\text{total}}(\text{w})$  in the  $\text{C}_2\text{H}_5\text{S} + \text{OH}$  reaction with a water molecule

| T(K) | $k_{R6w}$ | $k_{R12w}$ | $k_{\text{total}}(\text{w})$ | $k_{\text{total}}$ | $K_{\text{eq}}[\text{HO}\cdots\text{H}_2\text{O}]$ | $[\text{H}_2\text{O}]$ | $k'_{\text{total}}(\text{w})$ | $k'_{\text{total}}(\text{w})/k_{\text{total}}$ |
|------|-----------|------------|------------------------------|--------------------|----------------------------------------------------|------------------------|-------------------------------|------------------------------------------------|
| 200  | 3.28E-16  | 3.13E-16   | 6.41E-16                     | 3.64E-13           |                                                    |                        |                               |                                                |
| 236  | 3.01E-16  | 3.01E-16   | 6.02E-16                     | 3.54E-13           |                                                    |                        |                               |                                                |
| 250  | 2.95E-16  | 2.98E-16   | 5.93E-16                     | 3.50E-13           |                                                    |                        |                               |                                                |
| 275  | 2.86E-16  | 2.97E-16   | 5.84E-16                     | 3.45E-13           |                                                    |                        |                               |                                                |
| 298  | 2.82E-16  | 2.99E-16   | 5.81E-16                     | 3.46E-13           | 2.02E-19                                           | 2.15E+14               | 2.52E-20                      | 7.29E-08                                       |
| 300  | 2.82E-16  | 2.99E-16   | 5.81E-16                     | 3.48E-13           |                                                    |                        |                               |                                                |
| 309  | 2.81E-16  | 3.00E-16   | 5.81E-16                     | 3.50E-13           |                                                    |                        |                               |                                                |
| 325  | 2.80E-16  | 3.04E-16   | 5.83E-16                     | 3.53E-13           |                                                    |                        |                               |                                                |
| 350  | 2.80E-16  | 3.10E-16   | 5.90E-16                     | 3.62E-13           |                                                    |                        |                               |                                                |
| 420  | 2.91E-16  | 3.37E-16   | 6.29E-16                     | 3.97E-13           |                                                    |                        |                               |                                                |
| 500  | 3.17E-16  | 3.83E-16   | 7.01E-16                     | 4.57E-13           |                                                    |                        |                               |                                                |
| 600  | 3.66E-16  | 4.61E-16   | 8.27E-16                     | 5.57E-13           |                                                    |                        |                               |                                                |
| 800  | 5.13E-16  | 6.89E-16   | 1.20E-15                     | 8.42E-13           |                                                    |                        |                               |                                                |
| 1000 | 7.30E-16  | 1.02E-15   | 1.75E-15                     | 1.25E-12           |                                                    |                        |                               |                                                |
| 1200 | 1.03E-15  | 1.49E-15   | 2.51E-15                     | 1.79E-12           |                                                    |                        |                               |                                                |
| 1250 | 1.11E-15  | 1.62E-15   | 2.74E-15                     | 1.95E-12           |                                                    |                        |                               |                                                |
| 1500 | 1.64E-15  | 2.46E-15   | 4.11E-15                     | 2.89E-12           |                                                    |                        |                               |                                                |
| 1750 | 2.34E-15  | 3.59E-15   | 5.93E-15                     | 4.10E-12           |                                                    |                        |                               |                                                |
| 2000 | 3.24E-15  | 5.04E-15   | 8.28E-15                     | 5.59E-12           |                                                    |                        |                               |                                                |
| 2250 | 4.35E-15  | 6.86E-15   | 1.12E-14                     | 7.39E-12           |                                                    |                        |                               |                                                |
| 2500 | 5.71E-15  | 9.10E-15   | 1.48E-14                     | 9.52E-12           |                                                    |                        |                               |                                                |
| 2750 | 7.34E-15  | 1.18E-14   | 1.91E-14                     | 1.20E-11           |                                                    |                        |                               |                                                |
| 3000 | 9.26E-15  | 1.50E-14   | 2.43E-14                     | 1.48E-11           |                                                    |                        |                               |                                                |

$k_{R6w}$  and  $k_{R12w}$  was the rate constants ( $\text{cm}^3\cdot\text{molecule}^{-1}\cdot\text{s}^{-1}$ ) for Channel RW6, Channel RW12, respectively;  $k_{\text{total}}(\text{w})=k_{R6w}+k_{R12w}$ ;  $K_{\text{eq}}[\text{HO}\cdots\text{H}_2\text{O}]$  was the equilibrium constant for the processes of  $\text{HO} + \text{H}_2\text{O} \rightarrow \text{HO}\cdots\text{H}_2\text{O}$ ;  $k'_{\text{total}}(\text{w})$  was the effective rate constants of  $k_{\text{total}}(\text{w})$ ; water concentration taken from reference[1];

Beyond the water-catalyzed mechanisms of formations of  $\text{H}_2\text{O}$  and  $\text{HSOH}$  presented above, the effect of a single water molecule on the  $\text{C}_2\text{H}_5\text{S} + \text{OH}$  reaction under atmospheric conditions was also described. To meet this goal, Table S6 show the calculated rate constants for different conditions of Channel RW6 and RW12. It can be seen that The computed total rate constant for Channels RW6 ( $k_{R6w}$ ) and RW12 ( $k_{R12w}$ ) was  $6.41 \times 10^{-16} - 2.43 \times 10^{-14} \text{ cm}^3\cdot\text{molecule}^{-1}\cdot\text{s}^{-1}$ , which was much smaller than the corresponding value for the total rate constant ( $k_{R3}$ ), given that the ratio of  $k_{R6w}/k_{R3}$  was  $1.40 \times 10^{-3} - 1.76 \times 10^{-3}$ . Besides, obtain a more complete understanding of the effects of water vapor on the  $\text{C}_2\text{H}_5\text{S} + \text{OH}$  reaction reaction, it is necessary to compare the effective rates of the naked and water-catalyzed reactions. The rate for the naked reaction was written as

$$v_{R_{\text{total}}} = k_{\text{total}}[\text{C}_2\text{H}_5\text{S}][\text{OH}] \quad (1)$$

while water-catalyzed  $\text{C}_2\text{H}_5\text{S}+\text{OH}$  reaction via the  $\text{HO}\cdots\text{H}_2\text{O} + \text{C}_2\text{H}_5\text{S}$  reaction was written as

$$v_{k'_{\text{total}}(\text{w})} = k_{\text{total}}(\text{w}) [\text{HO}\cdots\text{H}_2\text{O}] [\text{C}_2\text{H}_5\text{S}] = k'_{\text{total}}(\text{w}) [\text{C}_2\text{H}_5\text{S}][\text{OH}] \quad (2)$$

In these equations,  $k'_{\text{total}}(\text{w}) = k_{\text{total}}(\text{w}) K_{\text{eq}}[\text{HO}\cdots\text{H}_2\text{O}] / [\text{H}_2\text{O}]$ .  $K_{\text{eq}}[\text{HO}\cdots\text{H}_2\text{O}]$  was the equilibrium constants for the formation of the  $\text{HO}\cdots\text{H}_2\text{O}$  complexes. The effective rate constants  $k'_{\text{RW}2\text{a}}$  and  $k'_{\text{RW}3\text{b}}$  depended parametrically on the water concentration and were directly compared to  $k_{\text{R}3}$ , the rate constant of the naked reaction. Table S6 shows the effective rate constant  $k'_{\text{total}}(\text{w})$  as well as the ratios of  $k'_{\text{total}}(\text{w})/k_{\text{total}}$  under 298 K. The results show that the effective rate constant of  $k'_{\text{total}}(\text{w})$  was  $2.52 \times 10^{-20} \text{ cm}^3 \cdot \text{molecule}^{-1} \cdot \text{s}^{-1}$ . The results indicate that water-catalyzed reactions were 8 orders of magnitude slower than the title reaction without water. In general, this finding indicates that a single water molecule has very little effect on the atmospheric  $\text{C}_2\text{H}_5\text{S}+\text{OH}$  reaction, and the catalytic effect of a single water molecule on the  $\text{C}_2\text{H}_5\text{S}+\text{OH}$  reaction is negligible under atmospheric conditions.

#### Reference

- [1] Yung, Y. L.; Demore, W. B.; Eds, Photochemistry of Planetary Atmospheres, Oxford Univ, Oxford, 1999.
